# Supplementary material
Source: Springer Nature journal article supplement (http://www.springermedizin.de/resource/supplementary/12986_2011_332_MOESM2_ESM.pdf/25655852)

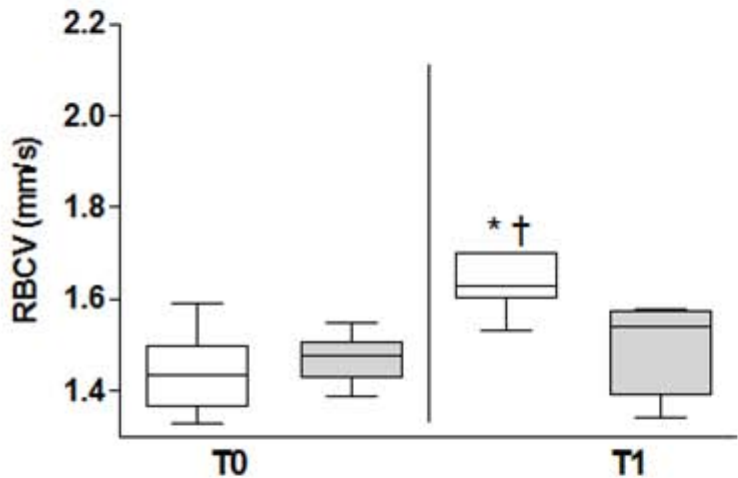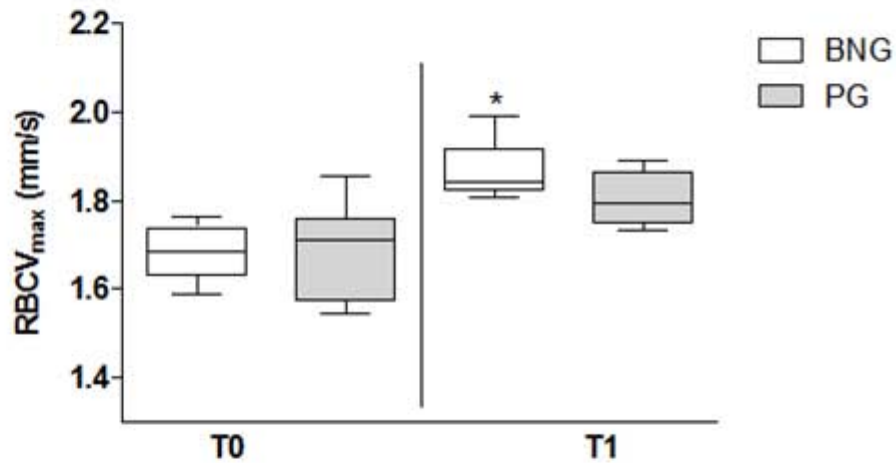

Supplement: MOESM2 [file 25655852]
